# Supplementary material
Source: PubMed Central journal article supplement (PMC5095406)
Supplement: 10.1074_M116.729871_jbc.M116.729871-1.pdf [file 10.1074_M116.729871_jbc.M116.729871-1.pdf]

## **Supplementary Information**

**Identification of the first Riboflavin Catabolic Gene Cluster isolated from *Microbacterium maritopicum* G10**

**Hui Xu, Yindrila Chakrabarty, Benjamin Philmus, Angad P. Mehta, Dhananjay Bhandari, Hans-Peter Hohmann, and Tadhg P. Begley\***

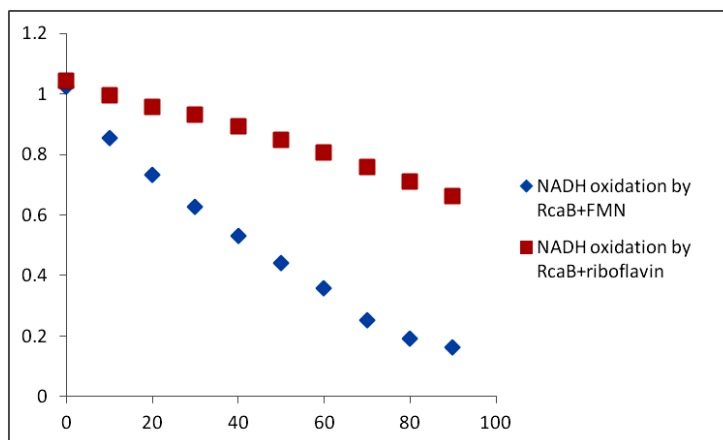

**Figure S1:** Comparative NADH oxidation rates by FMN (blue boxes) vs riboflavin (red boxes) in the presence of RcaB. The rate of reduction of FMN (shown by the decrease in absorbance of NADH at 340 nm) is ~ 10 times faster than the rate of reduction of riboflavin.

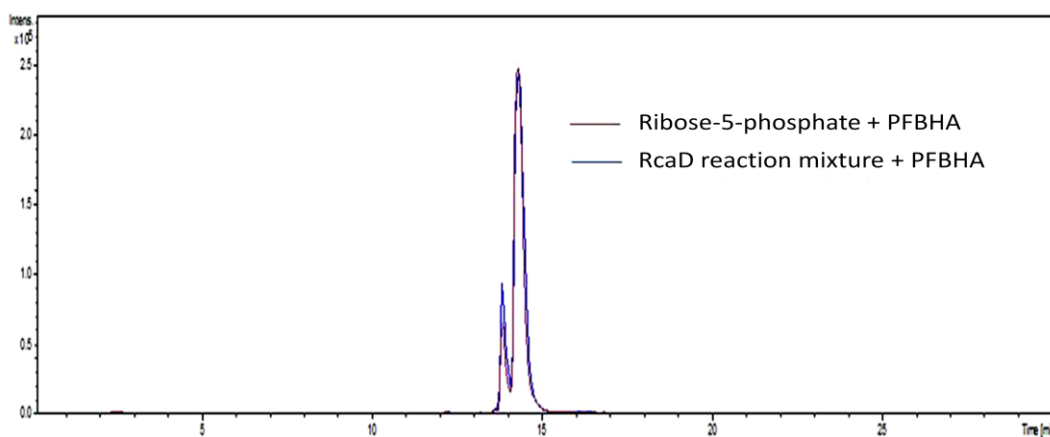

**Figure S2:** LC-MS trace showing the co-elution of the PFBHA oxime of the RcaD product with synthesized ribose-5-phosphate PFBHA oxime.

**Table S1:** Strains and plasmids used

| Strain/plasmid                        | Relevant characteristics                                                                                                                                                         | Reference or source |
|---------------------------------------|----------------------------------------------------------------------------------------------------------------------------------------------------------------------------------|---------------------|
| <i>Actinomyces</i>                    |                                                                                                                                                                                  |                     |
| <i>Microbacterium maritypicum</i> G10 | Wild-type strain catabolizing riboflavin                                                                                                                                         | This work           |
| <i>Streptomyces lividans</i> 1326     | Heterologous host for screening riboflavin catabolic gene cluster                                                                                                                | 1                   |
| <i>E. coli</i>                        |                                                                                                                                                                                  |                     |
| Epi100™                               | Host cell for construction of genomic library                                                                                                                                    | Epicentre           |
| S17-1                                 | TpR SmR <i>recA</i> , <i>thi</i> , <i>pro</i> , <i>hsdR</i> -M+RP4: 2-Tc:Mu: Km Tn7 λpir                                                                                         | 3                   |
| DH5α                                  | F- <i>endA1 glnV44 thi-1 recA1 relA1 gyrA96 deoR nupG</i> Φ80dlacZΔM15 Δ( <i>lacZYA-argF</i> )U169, <i>hsdR17</i> (r <sub>K</sub> <sup>-</sup> m <sub>K</sub> <sup>+</sup> ), λ- | Invitrogen          |
| BL21(DE3)                             | F- <i>ompT gal dcm lon hsdS<sub>B</sub></i> (r <sub>B</sub> <sup>-</sup> m <sub>B</sub> <sup>-</sup> ) λ(DE3 [ <i>lacI lacUV5-T7 gene 1 ind1 sam7 nin5</i> ])                    | Novagen             |
| <b>plasmid</b>                        |                                                                                                                                                                                  |                     |
| pOJ446                                | <i>aac(3)IV</i> , SCP2, <i>rep</i> <sup>PMB1*</sup> , attΦC31, <i>oriT</i>                                                                                                       | 1                   |
| pSET152                               | <i>aac(3)IV</i> , <i>lacZ</i> , <i>rep</i> <sup>PMB1*</sup> , attΦC31, <i>oriT</i>                                                                                               | 1                   |

**Table S2:** Comparison of gene annotations between the two gene clusters

| Genes from 5H7 | Genes from 1A4 | Protein homolog                                                                    | Identity (%)   |
|----------------|----------------|------------------------------------------------------------------------------------|----------------|
| RcaA           |                | Flavokinase<br><i>Arsenicococcus bolidensis</i>                                    |                |
| RcaB           | RcaB2          | Flavin reductase<br><i>Marine actinobacterium PHSC20C1</i>                         | 132/160<br>83% |
| RcaC           | RcaC2          | PadR family transcriptional regulator<br><i>Salinibacterium sp. PAMC 21357</i>     | 185/194<br>95% |
| RcaD           | RcaD2          | Ribokinase<br><i>Llyobacter polytropus DSM 2926</i>                                | 220/284<br>77% |
| RcaE           | RcaE2          | N5,N10-methylene tetrahydromethanopterin reductase<br><i>Bacillus sp. 10403023</i> | 434/459<br>95% |
| RcaF           | RcaF2          | Transporter<br><i>Marine actinobacterium PHSC20C1</i>                              | 269/282<br>95% |
|                | RcaJ2          | Hypothetical protein                                                               |                |
| RcaG           | RcaG2          | ABC transporter ATP-binding protein<br><i>Marine actinobacterium PHSC20C1</i>      | 251/265<br>95% |
| RcaH           |                | Phenol hydroxylase<br><i>Natronorubrum tibetense</i>                               |                |
